# Supplementary material
Source: bioRxiv or medRxiv preprint supplement (https://www.biorxiv.org/highwire/filestream/98055/field_highwire_adjunct_files/0/293506-1.pdf)
Supplement: Supplementary file [file 293506-1.pdf]

1  
2  
3  
4  
5  
6  
7  
8  
9  
10  
11  
12  
13  
14  
15  
16  
17  
18  
19  
20  
21  
22  
23  
24  
25  
26  
27  
28  
29  
30  
31  
32  
33  
34  
35  
36  
37  
38  
39

## Supplementary Information

# Calibration-independent Atomic Force Microscopy

*Carolina Pimenta-Lopes\*<sup>#</sup>, Carmen Suay-Corredera\*, Diana Velázquez-Carreras,  
David Sánchez-Ortiz, Jorge Alegre-Cebollada*

**Centro Nacional de Investigaciones Cardiovasculares Carlos III (CNIC), 28029  
Madrid, Spain**

\*equal contribution

<sup>#</sup>current address: Department of Physiological Sciences, University of Barcelona, Spain

Correspondence to Jorge Alegre-Cebollada: [jalegre@cnic.es](mailto:jalegre@cnic.es)

1 **Supplementary Table 1. Number of unfolding events per AFM experiment analyzed in this**  
 2 **study, following TFP or OFP strategies.**

3

| (C3) <sub>8</sub> ,<br>TFP | (C3) <sub>8</sub> ,<br>OFP with<br>(C3-L) <sub>4</sub> | (C3-L) <sub>4</sub> ,<br>TFP | (C3-L) <sub>4</sub> ,<br>OFP with<br>(C3) <sub>8</sub> | (C3-L) <sub>4</sub> ,<br>OFP with<br>(C3-SUMO1) <sub>4</sub> | (C3-SUMO1) <sub>4</sub> ,<br>TFP | (C3-SUMO1) <sub>4</sub> ,<br>OFP with<br>(C3-L) <sub>4</sub> |
|----------------------------|--------------------------------------------------------|------------------------------|--------------------------------------------------------|--------------------------------------------------------------|----------------------------------|--------------------------------------------------------------|
| 117                        | 117                                                    | 14                           | 29                                                     | 55                                                           | 69                               | 54                                                           |
| 84                         | 71                                                     | 35                           | 52                                                     | 42                                                           | 7                                | 71                                                           |
| 140                        | 182                                                    | 17                           | 81                                                     | 82                                                           | 119                              | 16                                                           |
| 141                        | 225                                                    | 42                           | 136                                                    | 14                                                           | 148                              | 92                                                           |
| 65                         | 30                                                     | 31                           | 13                                                     | 6                                                            | 149                              | 52                                                           |
| 224                        |                                                        | 38                           |                                                        | 42                                                           | 166                              | 57                                                           |
| 96                         |                                                        |                              |                                                        | 67                                                           | 47                               | 176                                                          |
| 191                        |                                                        |                              |                                                        | 47                                                           | 37                               | 29                                                           |
| 52                         |                                                        |                              |                                                        | 43                                                           |                                  | 41                                                           |
| 75                         |                                                        |                              |                                                        | 65                                                           |                                  | 38                                                           |
| 149                        |                                                        |                              |                                                        | 178                                                          |                                  | 230                                                          |
|                            |                                                        |                              |                                                        | 66                                                           |                                  | 84                                                           |
|                            |                                                        |                              |                                                        | 81                                                           |                                  | 70                                                           |
|                            |                                                        |                              |                                                        | 85                                                           |                                  | 33                                                           |

4

5

6

1 **Supplementary Table 2. Monte Carlo simulations considering different mechanical**  
 2 **unfolding parameters.** The table reports the value of RSD of the distribution of  $\Delta mF_u$ , at  
 3 different values of  $r_0$  and  $\Delta x$ . The remaining simulation parameters were the same as in Figure  
 4 1B in the main text.

|                    | <i>Calibration</i> | $r_0 = 0.01 \text{ s}^{-1}$ | $r_0 = 0.015 \text{ s}^{-1}$ | $r_0 = 0.01 \text{ s}^{-1}$  | $r_0 = 0.015 \text{ s}^{-1}$ |
|--------------------|--------------------|-----------------------------|------------------------------|------------------------------|------------------------------|
|                    | <i>Uncertainty</i> | $\Delta x = 0.2 \text{ nm}$ | $\Delta x = 0.2 \text{ nm}$  | $\Delta x = 0.25 \text{ nm}$ | $\Delta x = 0.25 \text{ nm}$ |
|                    | (%)                |                             |                              |                              |                              |
| <i>Concurrent</i>  | 3.6                | 0.033                       | 0.034                        | 0.025                        | 0.028                        |
|                    | 18                 | 0.035                       | 0.037                        | 0.035                        | 0.036                        |
| <i>Traditional</i> | 3.6                | 0.053                       | 0.054                        | 0.051                        | 0.045                        |
|                    | 18                 | 0.238                       | 0.232                        | 0.227                        | 0.231                        |

7  
 8  
 9  
 10

1 **Supplementary Text 1. Sequences of the proteins used in this report.**  
2 We highlight the sequence of the domains in different colors: C3, red; protein L, bold type;  
3 SUMO1, green). Linkers and extra amino acids are shown in regular black type.

4  
5 (C3)<sub>8</sub>  
6 MRGSHHHHHHGS**PVLITRPLEDQLVMVGQRVEFECEVSEEGAQVKWLKDGVELTREE**  
7 **TFKYRFKKDQQRHHLIINEAMLEDAGHYALCTSGGQALAEIVQEKRSPVLITRPLEDQ**  
8 **LVMVGQRVEFECEVSEEGAQVKWLKDGVELTREETFKYRFKKDQQRHHLIINEAMLE**  
9 **DAGHYALCTSGGQALAEIVQEKRSPVLITRPLEDQLVMVGQRVEFECEVSEEGAQVK**  
10 **WLKDGVELTREETFKYRFKKDQQRHHLIINEAMLEDAGHYALCTSGGQALAEIVQEKR**  
11 **RSPVLITRPLEDQLVMVGQRVEFECEVSEEGAQVKWLKDGVELTREETFKYRFKKDQ**  
12 **RHHLIINEAMLEDAGHYALCTSGGQALAEIVQEKRSPVLITRPLEDQLVMVGQRVEFE**  
13 **CEVSEEGAQVKWLKDGVELTREETFKYRFKKDQQRHHLIINEAMLEDAGHYALCTSG**  
14 **GQALAEIVQEKRSPVLITRPLEDQLVMVGQRVEFECEVSEEGAQVKWLKDGVELTRE**  
15 **ETFKYRFKKDQQRHHLIINEAMLEDAGHYALCTSGGQALAEIVQEKRSPVLITRPLED**  
16 **QLVMVGQRVEFECEVSEEGAQVKWLKDGVELTREETFKYRFKKDQQRHHLIINEAML**  
17 **EDAGHYALCTSGGQALAEIVQEKRSPVLITRPLEDQLVMVGQRVEFECEVSEEGAQV**  
18 **KWLKDGVELTREETFKYRFKKDQQRHHLIINEAMLEDAGHYALCTSGGQALAEIVQE**  
19 **KRSCC**

20  
21 (C3-L)<sub>4</sub>  
22 MRGSHHHHHHGS**PVLITRPLEDQLVMVGQRVEFECEVSEEGAQVKWLKDGVELTREE**  
23 **TFKYRFKKDQQRHHLIINEAMLEDAGHYALCTSGGQALAEIVQEKRSMEEVTIKANL**  
24 **IFANGSTQTAEFKGTFEKATSEAYAYADTLKKNGEWTVDVADKGYTLNIKFRSP**  
25 **VLITRPLEDQLVMVGQRVEFECEVSEEGAQVKWLKDGVELTREETFKYRFKKDQQRH**  
26 **HLIINEAMLEDAGHYALCTSGGQALAEIVQEKRSMEEVTIKANLIFANGSTQTAEFK**  
27 **GTFEKATSEAYAYADTLKKNGEWTVDVADKGYTLNIKFRSPVLITRPLEDQLVMV**  
28 **GQRVEFECEVSEEGAQVKWLKDGVELTREETFKYRFKKDQQRHHLIINEAMLEDAGH**  
29 **YALCTSGGQALAEIVQEKRSMEEVTIKANLIFANGSTQTAEFKGTFEKATSEAYAY**  
30 **ADTLKKNGEWTVDVADKGYTLNIKFRSPVLITRPLEDQLVMVGQRVEFECEVSEEG**  
31 **AQVKWLKDGVELTREETFKYRFKKDQQRHHLIINEAMLEDAGHYALCTSGGQALAEI**  
32 **VQEKRSMEEVTIKANLIFANGSTQTAEFKGTFEKATSEAYAYADTLKKNGEWTV**  
33 **DVADKGYTLNIKFRSCC**

34 (C3-SUMO1)<sub>4</sub>  
35 MRGSHHHHHHGS**PVLITRPLEDQLVMVGQRVEFECEVSEEGAQVKWLKDGVELTREE**  
36 **TFKYRFKKDQQRHHLIINEAMLEDAGHYALCTSGGQALAEIVQEKRSM****SDQEAKPST**  
37 **EDLGDKKEGEYIKLKVIGQDSSEIHFKVKMTTHLKKLKESYCQRQGVPMNSLRFLFEG**  
38 **QRIADNHTPKELGMEEDVIEVYQEQTGGRSPVLITRPLEDQLVMVGQRVEFECEVSEE**  
39 **GAQVKWLKDGVELTREETFKYRFKKDQQRHHLIINEAMLEDAGHYALCTSGGQALAE**  
40 **LIVQEKRSM****SDQEAKPSTEDLGDKKEGEYIKLKVIGQDSSEIHFKVKMTTHLKKLKESY**  
41 **CQRQGVPMNSLRFLFEGQRIADNHTPKELGMEEDVIEVYQEQTGGRSPVLITRPLEDQ**  
42 **LVMVGQRVEFECEVSEEGAQVKWLKDGVELTREETFKYRFKKDQQRHHLIINEAMLE**  
43 **DAGHYALCTSGGQALAEIVQEKRSM****SDQEAKPSTEDLGDKKEGEYIKLKVIGQDSSEI**  
44 **HFKVKMTTHLKKLKESYCQRQGVPMNSLRFLFEGQRIADNHTPKELGMEEDVIEVYQ**  
45 **EQTGGRSPVLITRPLEDQLVMVGQRVEFECEVSEEGAQVKWLKDGVELTREETFKYRF**  
46 **KKDQQRHHLIINEAMLEDAGHYALCTSGGQALAEIVQEKRSM****SDQEAKPSTEDLGDK**  
47 **KEGEYIKLKVIGQDSSEIHFKVKMTTHLKKLKESYCQRQGVPMNSLRFLFEGQRIADNH**  
48 **TPKELGMEEDVIEVYQEQTGGRSCC**  
49

1 **Supplementary Text 2. Estimation of uncertainty in cantilever calibration by the thermal**  
2 **fluctuations method.**

3 The thermal fluctuations method estimates the spring constant of the cantilever ( $k_{sc}$ ) from the  
4 deflection signal of a laser beam focused on the cantilever, measured by a split photodetector  
5 (Supplementary Figure 1). This method considers the cantilever as a harmonic oscillator and  
6 applies the equipartition theorem to obtain Equation S1 <sup>1</sup>:

7  
8 
$$k_{sc} = \frac{k_b \cdot T}{S^2 \cdot \langle z^2 \rangle} \quad \text{Equation S1}$$

9  
10 In Equation S1,  $k_b$  is the Boltzmann constant,  $T$  is the absolute temperature,  $S$  (deflection  
11 sensitivity, in nm/V) is the slope of the change in voltage detected by the photodetector for  
12 displacements of the surface while in contact with the cantilever, and  $\langle z^2 \rangle$  is the mean squared  
13 displacement of the free cantilever in units of  $V^2 \cdot m^2$ . Hence, cantilever calibration by the thermal  
14 fluctuations method requires estimation of  $S$  and  $\langle z^2 \rangle$ . Forces are then calculated from the  
15 deflection signal (A-B, in units of V) according to:

16  
17 
$$F = (A - B) \cdot S \cdot k_{sc} \quad \text{Equation S2}$$

18  
19 Combining Equations S1 and S2, we obtain

20  
21 
$$F = (A - B) \cdot \frac{k_b \cdot T}{S \cdot \langle z^2 \rangle} \quad \text{Equation S3}$$

22  
23 We measured experimental distributions of  $S$  and  $\langle z^2 \rangle$  for a single cantilever and found that the  
24 RSD of  $S$  was 3.5% while the RSD of  $\langle z^2 \rangle$  was 0.8% (Supplementary Figure 4). Hence, we  
25 conclude that inaccuracies in the determination of deflection sensitivity, which are 4-5 times  
26 larger than variations in  $\langle z^2 \rangle$ , are the main driver of interexperimental variation in spring  
27 constants of AFM cantilevers estimated using the thermal fluctuations method, as proposed  
28 before <sup>3</sup>.

29  
30 Considering error propagation, we propose that a reasonable value for the minimum calibration  
31 uncertainty in force is given by  $\sqrt{0.035^2 + 0.008^2} = 3.6\%$ . It is interesting to note that the  
32 uncertainty in the determination of  $k_{sc}$  is higher since it depends on the square of  $S$ :  
33  $\sqrt{(2 \cdot 0.035)^2 + 0.008^2} = 7.1\%$ . This effect can be observed in the distributions in  
34 Supplementary Figure 4.

35  
36 To obtain errors ( $\varepsilon$ ) in force for simulated AFM experiments, we drew random values from a  
37 normal distribution centered in 100 and whose RSD corresponds to the % uncertainty being  
38 considered. Then:

39  
40 
$$\varepsilon = \frac{\text{random value}}{100} \quad \text{Equation S4}$$

41  
42 This error is considered when calculating the probability of unfolding (Equation 3 in the main  
43 text).

1 **Supplementary Text 3. A model for the propagation of calibration errors to  $\Delta mF_u$ .**

2 We consider that each value of measured unfolding force ( $F_u^{measured}$ ) is affected by an error  $\delta$   
3 coming from uncertain force calibration:

4  
5 
$$F_u^{measured} = F_u^{real} + \delta$$
 Equation S5  
6

7 Hence, the value of  $mF_u$  that results from averaging unfolding data from  $m$  experiments, each  
8 one with a certain number of events  $n$ , can be estimated as:

9  
10 
$$mF_u^{measured} = \frac{\sum_{i=1}^{n_1}(F_{u,i}^{real} + \delta_{1,i}) + \dots + \sum_{i=1}^{n_m}(F_{u,i}^{real} + \delta_{m,i})}{n_1 + \dots + n_m}$$
 Equation S6  
11

12 We can consider that for every experiment  $j$ ,  $\sum_{i=1}^{n_j} F_{u,i}^{real} = n_j \cdot mF_{u,j}^{real}$ , where  $n_j$  is the number  
13 of events in experiment  $j$  and  $mF_{u,j}^{real}$  is the mean unfolding force that would have been  
14 measured in experiment  $j$  if there was no error in calibration. Similarly, considering that  
15  $\sum_{i=1}^{n_j} \delta_{j,i} = n_j \cdot \bar{\delta}_j$  is the average error per experiment, and  $n_{events} = n_1 + \dots + n_m$ , we obtain:

16  
17 
$$mF_u^{measured} = mF_u^{real} + \frac{\sum_{j=1}^m n_j \cdot \bar{\delta}_j}{n_{events}}$$
 Equation S7

18 Equation 1 in the main text is derived from Equation S7 considering comparison between two  
19 proteins under the assumption that  $\bar{\delta}_j$  is the same for both proteins when these are measured  
20 concurrently in the same AFM experiment.

1 **Supplementary Text 4. Interpretation of relative improvement in accuracy by concurrent**  
2 **AFM.**

3 Figure 1E shows that the degree of improvement in accuracy by concurrent relative to  
4 traditional AFM increases with the number of events per experiment and remains insensitive to  
5 the total number of experiments. Here, we provide a qualitative explanation for this observation.  
6

7 The RSD of the distribution of  $\Delta mF_u$  derives from two independent factors: the calibration  
8 uncertainty (Figure 1F) and the limited number of unfolding events defining the distribution of  
9 unfolding forces (Supplementary Figure 5B). In the case of balanced datasets obtained in  
10 concurrent AFM, the contribution of calibration uncertainty is zero as predicted from Equation  
11 1 (see main text).  
12

13 What are the consequences of increasing the number of events per experiment in the accuracy of  
14 AFM measurements?  
15

- 16 - In traditional AFM, increasing the number of events leads to better definition of the  
17 distribution of unfolding forces, but has no impact in the error associated to calibration  
18 uncertainty. In fact, at high number of events, the RSD of the distribution of  $mF_u$  is  
19 fairly insensitive to further increases in the number of events since it is dominated by  
20 errors associated to calibration uncertainty (Supplementary Figure 5B).  
21
- 22 - In concurrent AFM, the effect of better definition of distributions of unfolding forces is  
23 the same as in traditional AFM. However, since in concurrent AFM the contribution of  
24 calibration uncertainty to the RSD of the distribution of  $\Delta mF_u$  is null, the overall  
25 relative improvement in accuracy is higher than in traditional AFM.  
26

27 Increasing the number of experiments minimizes the impact of calibration uncertainty on  
28 individual experiments and also leads to an increase in the total number of events, both of which  
29 contribute to make the RSD of the distribution of  $\Delta mF_u$  smaller in traditional experiments  
30 (Figure 1C,D). In concurrent AFM, since there is no error associated to calibration uncertainty,  
31 RSD decreases only as a consequence of higher number of events. However, as explained  
32 above, the impact of higher number of events on the RSD of  $\Delta mF_u$  distributions is more  
33 pronounced for concurrent experiments. We suggest that this differential impact results in a  
34 fairly constant relative accuracy of concurrent vs. traditional AFM regardless of the number of  
35 experiments considered (Figure 1E).  
36  
37

1 **Supplementary Text 5. Validity of the linear approximation in the procedure used to**  
2 **obtain distributions of unfolding forces.**

3 In our Monte Carlo simulations, we approximate the instantaneous probability of unfolding to  
4 the linear regime (Equation 3 in the main text), which is valid at low values of  $n \cdot r \cdot \Delta t$ .

5 Considering that the  $mF_u$  obtained in our simulations is around 100 pN, we can estimate the  
6 maximum number of events at the midpoint of the unfolding distribution that still satisfy  $n \cdot r \cdot$   
7  $\Delta t < 0.05$ , which according to Equation 3, is 385 (considering  $r_0 = 0.01 \text{ s}^{-1}$  and  $\Delta x = 0.2 \text{ nm}$ ).

8 Hence, we always kept the number of simulated unfolding events below  $2 \times 385$ .

9



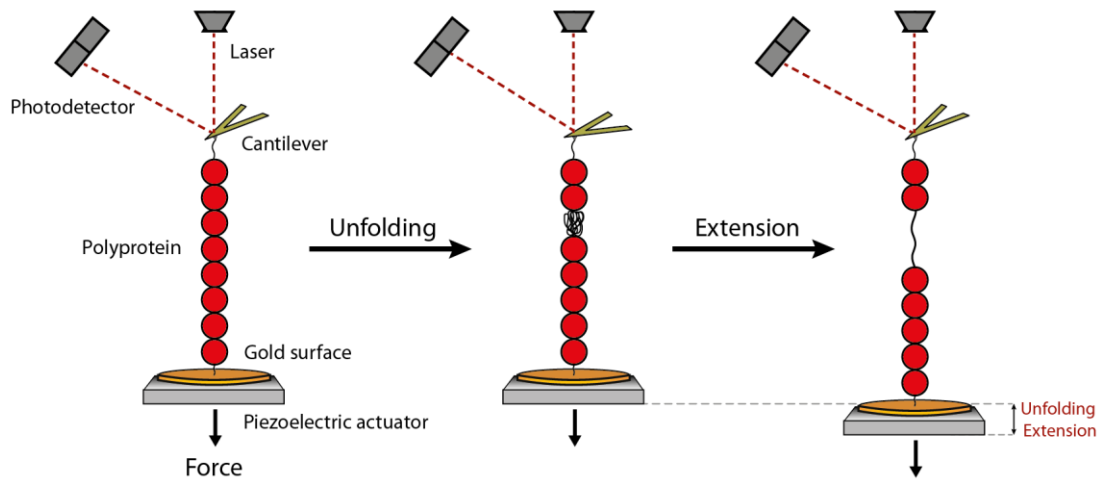

**Supplementary Figure 1. Schematic representation of a single-molecule force-clamp AFM experiment.** A single polyprotein is tethered between an AFM cantilever and a gold-coated surface. *Left:* The piezoelectric actuator moves away from the cantilever, which results in a pulling force applied to the polyprotein. The magnitude of the pulling force is calculated from the difference in voltage between the two regions of a split photodetector that is reached by a laser beam reflecting on the cantilever. *Middle:* When a domain unfolds, the force relaxes momentarily, changing the laser deflection. *Right:* To recover the programmed force set point in force-clamp experiments, the piezoelectric actuator is displaced, stretching the polyprotein and producing an unfolding step in experimental recordings (Figure 1A).

1  
2  
3

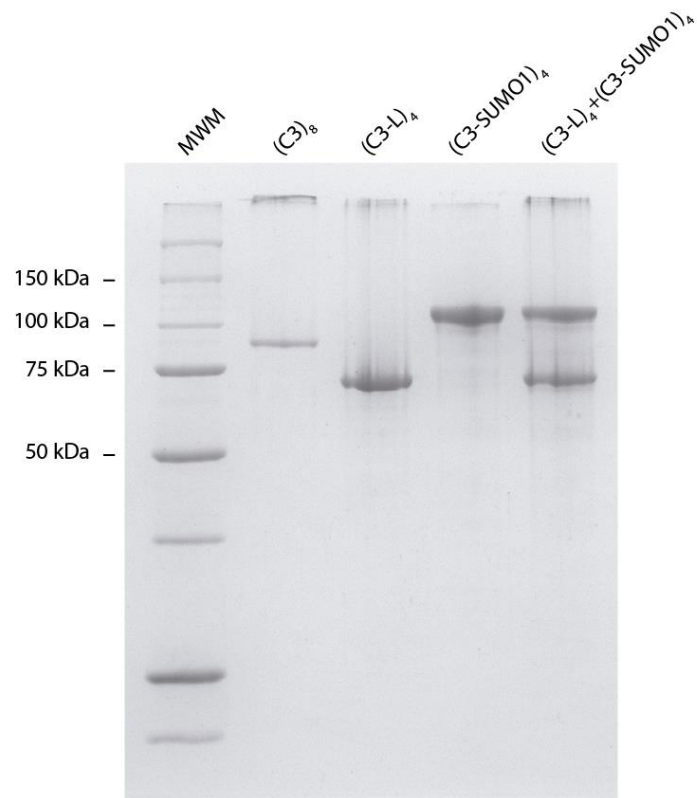

**Supplementary Figure 2. 12% SDS-PAGE analysis of the purified proteins used in this report.** We note that the C3-containing polyproteins have a tendency to show high-molecular weight aggregates that do not enter the resolving gel. We interpret this effect as an artifact of the electrophoresis, since equivalent aggregates do not appear in the void volume of the size-exclusion chromatography. MWM: Precision Plus Protein Unstained Standards (Bio-Rad). The last lane shows results from simultaneous purification of (C3-L)<sub>4</sub> and (C3-SUMO1)<sub>4</sub>

1  
2

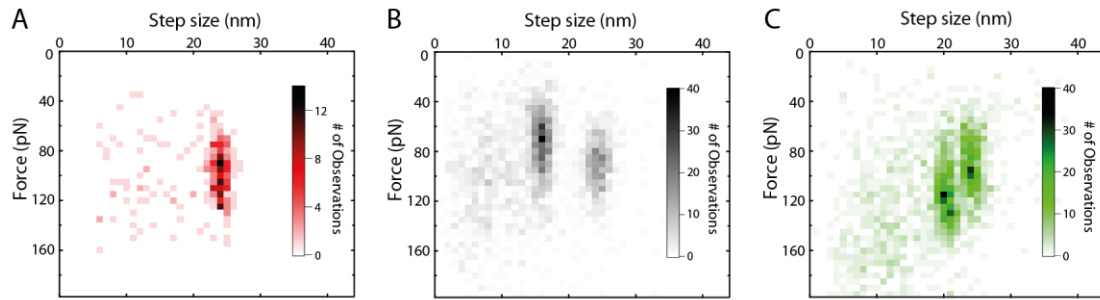

**Supplementary Figure 3. Definition of fingerprinting unfolding lengths of C3, protein L and SUMO1.** Polyproteins were pulled at a rate of 40 pN/s. All traces containing at least two events of the same step size were included in this analysis. The bidimensional histograms show the frequency of the size and force of all steps in the selected traces. In all cases, the main populations of unfolding lengths are clearly identified from a background of steps that correspond to non-specific interactions. For subsequent analysis, only traces showing the fingerprinting unfolding lengths were considered. **(A)** Results obtained for the mechanical unfolding of  $(C3)_8$  ( $n = 293$  steps), showing a single population of unfolding events at  $24 \pm 1$  nm and around 90 pN. **(B)** Results obtained for the mechanical unfolding of  $(C3-L)_4$  ( $n = 2555$  steps). The two well-defined populations correspond to unfolding of L domains (step size  $16 \pm 1$  nm at around 70 pN) and to unfolding of C3 (step size  $24 \pm 1$  nm at around 90 pN). **(C)** Results obtained for the mechanical unfolding of  $(C3-SUMO1)_4$  ( $n = 1998$  steps). The two well-defined populations correspond to unfolding of SUMO1 (step size  $20 \pm 1$  nm at around 115 pN) and C3 (step size  $24 \pm 1$  nm at around 90 pN).

1  
2

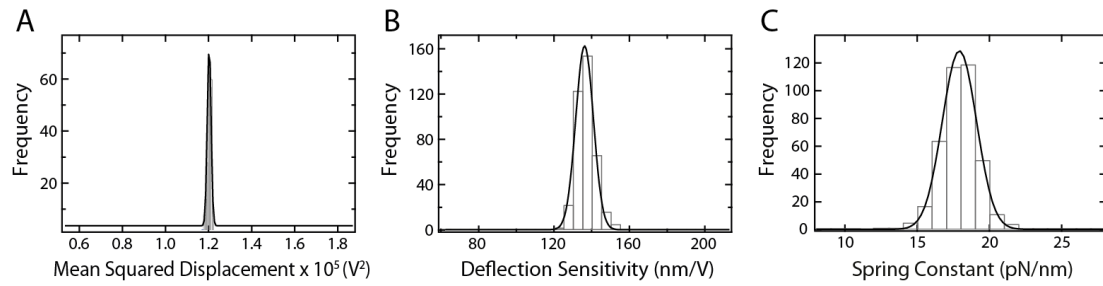

**Supplementary Figure 4. Experimental estimation of calibration uncertainty from multiple rounds of calibration of the same cantilever.** (A) Distribution of 250 measurements of mean squared displacement ( $\langle z^2 \rangle$ ) for a single cantilever ( $1.2 \cdot 10^{-5} \pm 9.2 \cdot 10^{-8} \text{ V}^2$ ). (B) Distribution of 388 measurements of the deflection sensitivity ( $S$ ) for a single cantilever ( $136.7 \pm 4.9 \text{ nm/V}$ ). (C) Considering  $\langle z^2 \rangle = 1.2 \cdot 10^{-5} \text{ V}^2$ , we show the distribution of spring constants that arise from the values of deflection sensitivity in panel B ( $17.9 \pm 1.3 \text{ pN/nm}$ ). Solid lines are Gaussian fits to the data. Mean  $\pm$  SD of the distributions are indicated. In the three panels, the relative range of the  $x$  axes with respect to the mean value is the same.

1

2

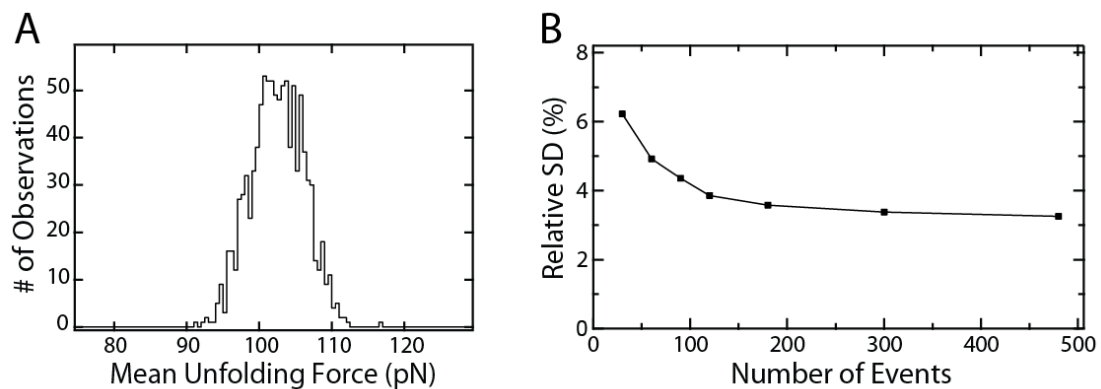

**Supplementary Figure 5. Spread in mean unfolding force for an individual protein. (A)** Distribution of  $mF_u$  corresponding to one traditional experiment (200 events), as estimated from Monte Carlo simulations. **(B)** Dependence of the RSD in the distribution of  $mF_u$  with the number of unfolding events, obtained from simulations of a single protein in an AFM traditional experiment. We considered a 3.6% calibration uncertainty. At low number of events, the distribution of  $mF_u$  is not well defined and the RSD is high. At higher number of events, the distribution of  $mF_u$  is well sampled, and the major contributor to RSD is the calibration uncertainty.

- 1
- 2
- 3

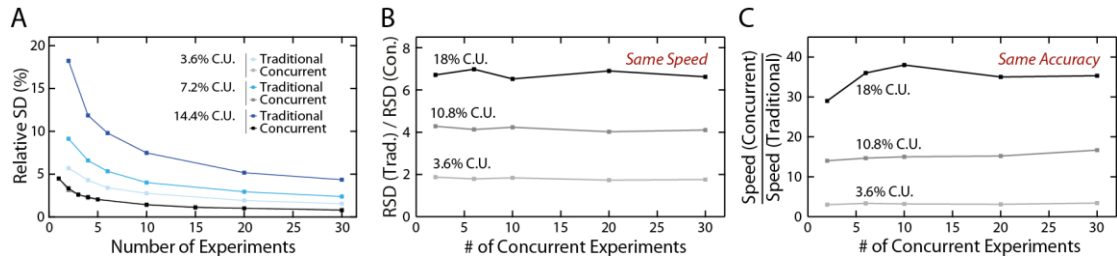

**Supplementary Figure 6. Increased accuracy and speed of data acquisition by concurrent AFM measurements.** (A) RSD of the distribution of  $\Delta mF_u$  estimated from Monte Carlo simulations at different calibration uncertainties (C.U.) and number of experiments. Note that in the case of concurrent measurement, the RSD values overlap for the three calibration uncertainties. (B) Relative increase in accuracy achieved by concurrent with respect to traditional AFM (at equivalent speeds of data acquisition), at different calibration uncertainties and number of experiments. (C) Relative increase in throughput achieved by concurrent with respect to traditional AFM (at equivalent accuracy), at different calibration uncertainties and number of experiments. Speed(Concurrent)/Speed(Traditional) was calculated as the ratio between the number of traditional and concurrent experiments that are needed to achieve the same RSD. All simulations considered 100 unfolding events per protein and experiment.

1  
2

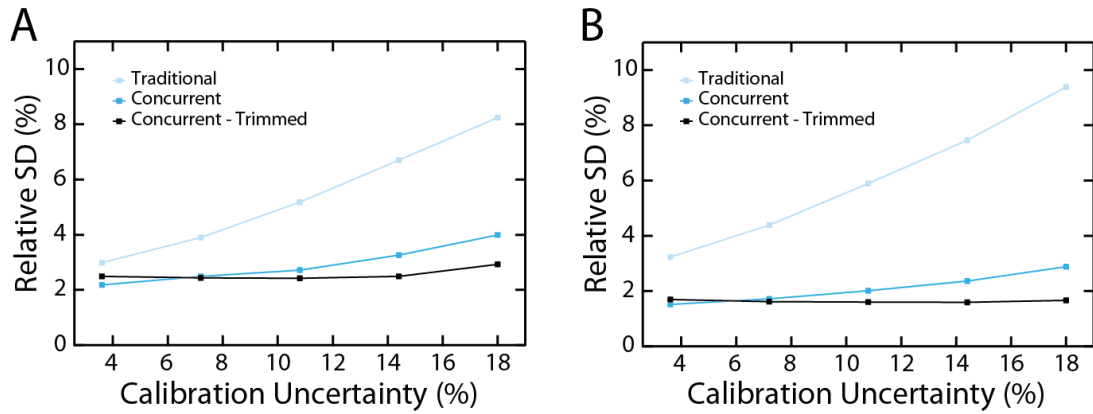

**Supplementary Figure 7. Application of Monte Carlo simulations to estimate RSD associated to real datasets.** **(A)** Monte-Carlo-estimated RSD of the distributions of  $\Delta mF_u$  obtained from the AFM experiments that compare the  $mF_u$  of C3 in the context of  $(C3)_8$  and  $(C3-L)_4$  (see Figure 2 in the main text). Simulations are fed with the actual number of unfolding events measured experimentally (Supplementary Table 1). Simulations were also run with trimmed concurrent datasets, by removing data to equal the number of events per protein within a concurrent experiment. **(B)** Monte-Carlo-estimated RSD of the distributions of  $\Delta mF_u$  obtained from the AFM experiments that compare the  $mF_u$  of C3 in the context of  $(C3-L)_4$  and  $(C3-SUMO1)_4$  (see Figure 3 in the main text). Simulations are fed with the actual number of unfolding events measured experimentally (Supplementary Table 1). Simulations were also run with trimmed concurrent datasets, by removing data to equal the number of events per protein within a concurrent experiment.

1  
2

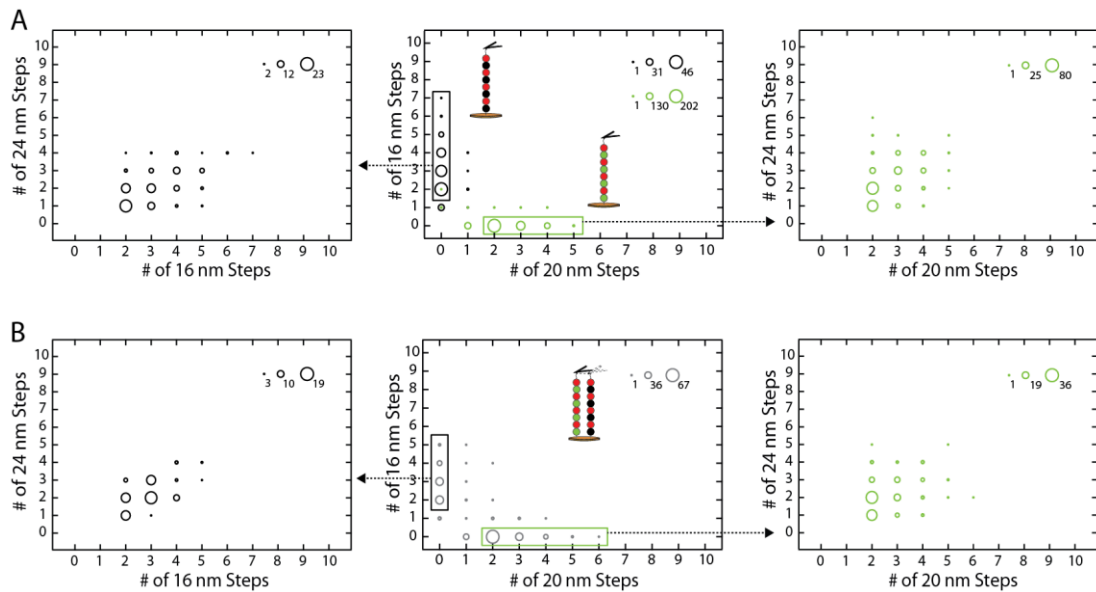

**Supplementary Figure 8. Protein gating in dual-marker orthogonal fingerprinting. (A)** Traditional fingerprinting. **(B)** Orthogonal fingerprinting. All the plots show the frequency of the traces that have different combinations of unfolding events, as indicated by the size of the dots. (C3-L)<sub>4</sub> and (C3-SUMO1)<sub>4</sub> unfolding traces were first classified according to the number of marker 16 and 20 nm steps (middle panels). Sorted traces were further classified according to the number of 24 nm steps, which correspond to C3 unfolding events (left and right panels). Results show that highly similar distributions are obtained in traditional and orthogonal fingerprinting experiments, providing further support to the gating protocol to sort traces coming from mixtures of proteins.

1  
2



1

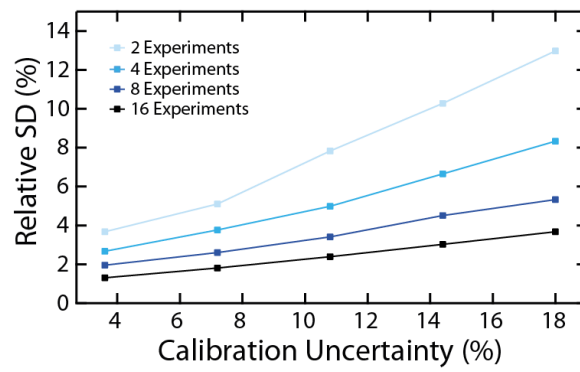

**Supplementary Figure 9. Variation in accuracy of concurrent AFM due to unbalanced datasets depends on the number of averaged experiments.** Monte-Carlo-estimated RSD of the distributions of  $\Delta mF_u$  taking into account increasing number of concurrent experiments. We have simulated unbalanced datasets with alternating 50/150 events for each protein in each experiment.

2

3

4

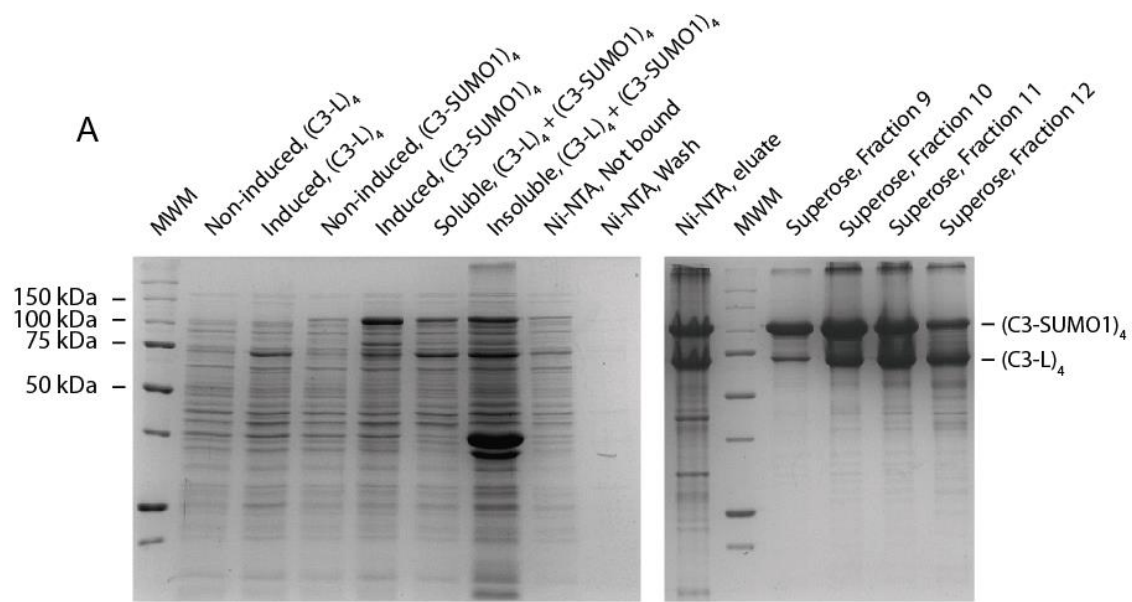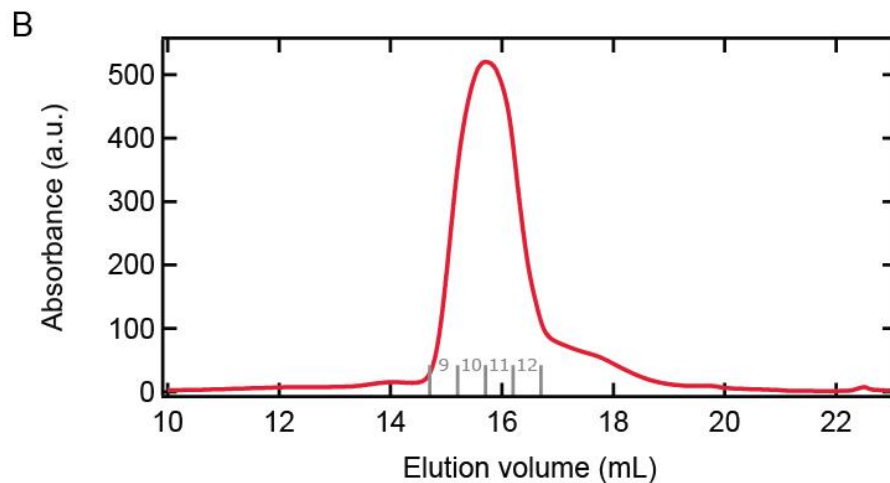

**Supplementary Figure 10. Simultaneous purification of (C3-SUMO1)<sub>4</sub> and (C3-L)<sub>4</sub>.** (A) 12% SDS-PAGE to monitor the steps of expression and purification. *E. coli* cells containing the expression plasmid for (C3-SUMO1)<sub>4</sub> or (C3-L)<sub>4</sub> proteins are induced separately. The expression of the proteins is detected in the induced samples. Both cell cultures are lysed together, and the resulting soluble fraction is loaded in a Ni-NTA column. The fractions of highest protein concentration after elution with imidazole are subject to size-exclusion chromatography in an FPLC system using a Superose 6 Increase 10/300 GL column. Fractions 9-12 contain different proportions of a mixture of (C3-SUMO1)<sub>4</sub> and (C3-L)<sub>4</sub>. OFP experiments can be set with these fractions directly. The preferred fraction gives similar number of unfolding events for both proteins. MWM: Precision Plus Protein Unstained Standards (Bio-Rad). (B) Chromatogram corresponding to the size exclusion chromatography shows that (C3-SUMO1)<sub>4</sub> and (C3-L)<sub>4</sub> are not resolved and co-elute in fractions 9-12.

1 **Supplementary References**

- 2 1.Hutter, J. L. *et al.* Calibration of atomic-force microscope tips. *Review of Scientific*  
3 *Instruments* **64**, 1868-1873. (1993).  
4 2.Popa, I. *et al.* Force dependency of biochemical reactions measured by single-molecule force-  
5 clamp spectroscopy. *Nat Protoc* **8**, 1261-1276. (2013).  
6 3.Ohler, B. Practical Advice on the Determination of Cantilever Spring Constants. Veeco  
7 Instruments Incorporated, Technical Report., (2007).  
8 4.Shi, J. *et al.* Simulated data sets for single molecule kinetics: some limitations and  
9 complications of data analysis. *European biophysics journal : EBJ* **35**, 633-645. (2006).

10
